## Risk factors of coronary microvascular obstruction

Yong Li <sup>1</sup> and Shuzheng Lyu <sup>2</sup>

<sup>1</sup>Emergency and Critical Care Center, Beijing Anzhen Hospital, Capital Medical University  
, Beijing 100029, China

<sup>2</sup>Department of Cardiology, Beijing Anzhen Hospital, Capital Medical University,  
Beijing 100029, China.

Correspondence should be addressed to Yong Li; [liyongdoctor@sina.com](mailto:liyongdoctor@sina.com) and Shuzheng Lyu;  
[shuzheng023@163.com](mailto:shuzheng023@163.com).

### Abstract

**Background.** Coronary microvascular obstruction /no-reflow(CMVO/NR) is a predictor of long-term mortality in survivors of ST elevation myocardial infarction (STEMI) underwent primary percutaneous coronary intervention (PPCI). **Objective.** To identify risk factors of CMVO/NR. **Methods.** Totally 2384 STEMI patients treated with PPCI were divided into two groups according to thrombolysis in myocardial infarction(TIMI) flow grade:CMVO/NR group(246cases,TIMI 0-2 grade) and control group(2138 cases,TIMI 3 grade). We used univariable and multivariable logistic regression to identify risk factors of CMVO/NR. **Results.** A frequency of CMVO/NR was 10.3%(246/2384). Logistic regression analysis showed that the differences between the two groups in age(unadjusted odds ratios [OR] 1.032; 95% CI, 1.02 to 1.045; adjusted OR 1.032; 95% CI, 1.02 to 1.046 ; P <0.001), periprocedural bradycardia (unadjusted OR 2.357 ; 95% CI, 1.752 to 3.171; adjusted OR1.818; 95% CI, 1.338 to 2.471 ; P <0.001),using thrombus aspiration devices during operation (unadjusted OR 2.489 ; 95% CI, 1.815 to 3.414; adjusted OR1.835; 95% CI, 1.291 to 2.606 ; P =0.001),neutrophil percentage (unadjusted OR 1.028 ; 95% CI, 1.014 to 1.042; adjusted OR1.022; 95% CI, 1.008 to 1.036 ; P =0.002) , and completely block of culprit vessel (unadjusted OR 2.626; 95% CI, 1.85 to 3.728; adjusted-OR 1.656;95% CI, 1.119 to 2.45; P =0.012) were statistically significant ( P <0. 05). The

area under the receiver operating characteristic curve was 0.6896 .**Conclusions.** Age , periprocedural bradycardia, using thrombus aspiration devices during operation, neutrophil percentage ,and completely block of culprit vessel may be independent risk factors for predicting CMVO/NR.

We registered this study with WHO International Clinical Trials Registry Platform (ICTRP) (registration number: ChiCTR1900023213; registered date: 16 May 2019).<http://www.chictr.org.cn/edit.aspx?pid=39057&htm=4>.

Key Words: Coronary disease ST elevation myocardial infarction No-reflow phenomenon Percutaneous coronary intervention

## Background

Coronary microvascular obstruction /no-reflow(CMVO/NR) is a predictor of long-term mortality in survivors of ST elevation myocardial infarction (STEMI)underwent primary percutaneous coronary intervention (PPCI).<sup>[1-4]</sup>CMVO/NR is defined as inadequate myocardial perfusion after successful mechanical opening of the infarct-related artery.<sup>[1,4,5]</sup> CMVO/NR is diagnosed immediately after PPCI when postprocedural angiographic thrombolysis in myocardial infarction(TIMI)flow is <3.<sup>[4,5]</sup> There have been few large clinical trials of therapies ,specifically aimed at reducing CMVO/NR.<sup>[1,6]</sup>Prevention of CMVO/NR is a crucial step. We want to identify risk factors of CMVO/NR.

## Methods

Totally 2384 STEMI patients who were consecutively treated with PPCI in Beijing Anzhen Hospital, Capital Medical University between 2007 and 2018.

Prior to emergency angiography, all patients received 300 mg of aspirin, 300 to 600 mg of clopidogrel or 180 mg of ticagrelor and unfractionated heparin.

Inclusion criteria: STEMI patients presenting within 12 hours from the symptom onset who were treated with PPCI . We established the diagnosis of acute myocardial infarction (AMI) and STEMI

base on fourth universal definition of myocardial infarction . [7]

Exclusion criteria. 1. patients received thrombolysis; 2. patients received bivalirudin.

CMVO/NR was defined as TIMI < 3. [4,5]

We selected 15 predictor variables for inclusion in our prediction rule. They were shown in Table 1.

Periprocedural bradycardia was defined as preoperative heart rate  $\geq 50$  times / min, intraoperative heart rate <50 times / min persistent or transient. [8] Intraoperative hypotension was defined as preoperative systolic blood pressure was > 90mmHg, intraoperative systolic blood pressure less than or equal to 90 mmHg persistent or transient. [9]

### **Statistical analysis.**

We followed the methods of Li et al. 2019. [10]

## **Results**

During PPCI procedure, 2138 patients had a TIMI flow grade 3 (group with normal epicardial flow) and 246 patients had a TIMI flow grade 0~2 (group with CMVO/NR). Baseline characteristics of the patients were shown in Table 1. We used univariable and multivariable logistic regression to identify predictors of CMVO/NR. We identified 10 variables (age, sex ,completely block of culprit vessel,periprocedural bradycardia,intraoperative hypotension,using thrombus aspiration devices during operation, neutrophil percentage,hemoglobin,the time between myocardial infarction and PPCI,and the culprit vessel was left circumflex) as predictors of CMVO/NR in univariable analysis. Five variables ( age, periprocedural bradycardia,using thrombus aspiration devices during operation, neutrophil percentage,and completely block of culprit vessel) remained as independent predictors of CMVO/NR in multivariable analysis. The results were shown in Table 2 and Table3.

The receiver operating characteristic curve was drawn . The area under the receiver operating characteristic curve was  $0.6896 \pm 0.017$ , 95% CI=0.656~0.723.

## **Discussion**

CMVO/NR is a multifactorial phenomenon and five mechanisms have been recognized : (i) pre-

existing microvascular dysfunction, (ii) distal microthrombo-embolization, (iii) ischemic injury, (iv) reperfusion injury and (v) individual susceptibility.<sup>[5]</sup> In our study, age , periprocedural bradycardia, using thrombus aspiration devices during operation, neutrophil percentage, and completely block of culprit vessel are associated with an increased risk of CMVO/NR.

Advanced age has been reported to be an independent risk factor of CMVO/NR.<sup>[5]</sup> Previous studies indicate that abnormal non-endothelium-dependent microvascular dilatation appears to be involved in functional and structural alterations that lead to impaired coronary flow reserve with aging.<sup>[5]</sup>

Periprocedural bradycardia may be a sign of CMVO/NR.<sup>[10]</sup> In our study, patients with periprocedural bradycardia were at 1.82 higher risk of CMVO/NR than patients without periprocedural bradycardia. Myocardial reperfusion can evoke activation of Bezold-Jarisch reflex.

<sup>[11]</sup>The Bezold-Jarisch reflex means bradycardia, vasodilation, and hypotension.

<sup>[12]</sup>Acetylcholine, which is endothelium-dependent vasodilator, induces coronary dilation in young healthy subjects but cause vasoconstriction in patients with atherosclerosis.<sup>[10]</sup> Excessive vagus nerve excitation is an important factor that may cause CMVO/NR. We should inhibit it to prevent and treat CMVO/NR.

Completely block of culprit vessel is a independent risk factor of CMVO/NR.<sup>[13]</sup> In our study, patients with completely block of culprit vessel were at 1.66 higher risk of CMVO/NR than patients without completely block of culprit vessel. Good patency of the infarct-related artery prior to PPCI suggests lower thrombus burden and so on.<sup>[14]</sup>

Neutrophil percentage is an independent risk factor for CMVO/NR. Neutrophil plugging plays a role in the pathogenesis of CMVO/NR. A massive infiltration of microcirculation by neutrophils occurs at the time of reperfusion.<sup>[15]</sup> Activated neutrophils release reactive oxygen species and

proinflammatory molecules , which can contribute to CMVO/NR. <sup>[15]</sup>

Using thrombus aspiration device during PCI is closely related to CMVO/NR. Routine thrombus aspiration is not recommended, but in cases of large residual thrombus burden after opening the vessel with a guide wire or a balloon, thrombus aspiration may be considered. <sup>[4]</sup>Thrombus aspiration device tend to be used when the thrombus load is high, while CMVO/NR tends to occur.

### **Study Limitations**

This is a single center experience. Some patients were enrolled >10 years ago thus their treatment may not conform to current standards and techniques. Only TIMI flow grade was used to identify CMVO/NR, and no other diagnostic methods were used because of limited data. We want to get risk factors of CMVO/NR before it happen, some variables associated with CMVO/NR was not including, so the area under the receiver operating characteristic curve was not strong enough.

### **Conclusions**

Age,periprocedural bradycardia,using thrombus aspiration devices during operation,neutrophil percentage,and completely block of culprit vessel may be independent risk factors for predicting CMVO/NR.

### **List of abbreviations**

|      |                                    |
|------|------------------------------------|
| AMI: | Acute myocardial infarction        |
| CMVO | Coronary microvascular obstruction |
| NR   | No-reflow                          |
| PCI: | Percutaneous coronary intervention |

PPCI: Primary percutaneous coronary intervention

STEMI: ST elevation myocardial infarction

TIMI: Trombolysis in myocardial infarction risk score

## **Declarations**

### **Ethics approval and consent to participate**

Ethic committee approved the study. Approved No. of ethic committee: 2019013X.

Name of the ethic committee : Ethics committee of Beijing Anzhen Hospital Capital Medical

University. It was a retrospective analysis and informed consent was waived by Ethics Committee of Beijing Anzhen Hospital Capital Medical University.

### **Statement of human and animal rights**

All procedures performed in studies involving human participants were in accordance with the ethical standards of the institutional and/or national research committee and with the 1964 Helsinki declaration and its later amendments or comparable ethical standards. The study was not conducted with animals.

### **Consent for publication**

Not applicable.

### **Availability of data and materials**

The data used to support the findings of this study are included within the supplementary information file.

The data are demographic, clinical, and angiographic characteristics of patients with acute STEMI

during PPCI. AH= History of angina; AGE= age; CBCV=completely block of culprit vessel; CNR=CMVO/NR; DH= history of diabetes; H=hemoglobin ; HH = history of hypertension; IH= introperative hypotension ; LAD= the culprit vessel was left anterior descending coronary artery; LCX= the culprit vessel was left circumflex coronary artery ;MIH=history of myocardial infarction; NP=neutrophil percentage; PB=periprocedural bradycardia; PCIH=history of percutaneous coronary intervention; RCA= the culprit vessel was right coronary artery ;S = sex; TA=using thrombus aspiration devices during operation; TBMIPPCI =the time between myocardial infarction and PPCI.

### **Competing interests**

The authors declare that they have no conflicts of interest.

### **Funding**

None.

### **Authors' contributions**

Yong Li contributed to generating, analysing, and interpreting the study data and drafted the manuscript. Shuzheng Lyu contributed to planning and revised the manuscript critically for important intellectual content. Yong Li and Shuzheng Lyu are responsible for the overall content as guarantor.

All authors have read and approved the manuscript.

### **Acknowledgements**

None.

**Table 1. Demographic ,clinical ,and angiographic characteristics of patients with CMVO/NR and normal coronary flow during PPCI**

| Characteristic<br>[lower limit, upper limit]         | Total<br>(n =2384) | CMVO/NR<br>(n =246) | Normal<br>Flow<br>(n=2138) | P>  Z  | Odds<br>Ratio | 95% CI       |
|------------------------------------------------------|--------------------|---------------------|----------------------------|--------|---------------|--------------|
| Age(year,x±s) [23,80]                                | 57±11              | 60±11               | 56±11                      | <0.001 | 1.032         | 1.02~1.045   |
| Man n(%) 0=No, 1=Yes                                 | 1985(83.2)         | 190(77.2)           | 1795(84)                   | 0.008  | .648          | .471~.892    |
| History of hypertension<br>n(%)0=No, 1=Yes           | 1248(52.3)         | 132(53.7)           | 1116(52.2)                 | 0.664  | 1.06          | .814 ~1.382  |
| History of diabetes<br>n(%)0=No, 1=Yes               | 617(25.9)          | 71(28.9)            | 546(25.5)                  | 0.26   | 1.183         | .883 ~1.585  |
| History of angina<br>n(%)0=No, 1=Yes                 | 1093(45.8)         | 105(42.7)           | 988(46.2)                  | 0.293  | .867          | .664 ~1.132  |
| History of myocardial infarction<br>n(%) 0=No, 1=Yes | 190(7.9)           | 21(8.5)             | 169(7.9)                   | 0.729  | 1.087         | .677 ~1.747  |
| History of PCI<br>n(%) 0=No, 1=Yes                   | 230(9.6)           | 27(11)              | 203(9.5)                   | 0.457  | 1.175         | .768 ~1. 798 |
| Culprit vessel site<br>n(%) 0=No, 1=Yes              |                    |                     |                            |        |               |              |
| Left anterior descending                             | 1147(48.1)         | 114(46.3)           | 1033(48.3)                 | 0.557  | .924          | .709 ~1.204  |
| Left circumflex                                      | 278(11.7)          | 19(7.7)             | 259(12.1)                  | 0.044  | .607          | .374 ~.987   |
| Right coronary artery                                | 961(40.3)          | 113(45.9)           | 848(39.7)                  | 0.058  | 1.292         | .991 ~1.685  |



|                                                                    |            |           |            |        |       |             |
|--------------------------------------------------------------------|------------|-----------|------------|--------|-------|-------------|
| Completely block of culprit vessel                                 |            |           |            |        |       |             |
| n(%)0=No, 1=Yes                                                    | 1622(68)   | 206(83.7) | 1416(66.2) | <0.001 | 2.626 | 1.85~3.728  |
| Using thrombus aspiration devices                                  |            |           |            |        |       |             |
| during operation n(%)0=No, 1=Yes                                   | 1463(61.4) | 193(78.5) | 1270(59.4) | <0.001 | 2.489 | 1.815~3.414 |
| Periprocedural bradycardia                                         |            |           |            |        |       |             |
| n(%) 0=No, 1=Yes                                                   | 404(16.9)  | 74(30.1)  | 330(15.4)  | <0.001 | 2.357 | 1.752~3.171 |
| Intraoperative hypotension                                         |            |           |            |        |       |             |
| n(%) 0=No, 1=Yes                                                   | 225(9.4)   | 40(16.3)  | 185(8.7)   | <0.001 | 2.05  | 1.415~2.97  |
| The time between myocardial infarction and PPCI (min,x±s) [60,720] | 334±155    | 354±153   | 332±156    | 0.039  | 1.001 | 1. ~1.002   |
| Neutrophil percentage (% ,x±s) [27.8,95.4]                         | 77±12      | 80±10     | 77±12      | <0.001 | 1.028 | 1.014~1.042 |
| Hemoglobin(g/l,x±s) [69,208]                                       | 147±16     | 145±16    | 148±16     | 0.003  | .988  | .98~ .996   |

**Table 2. Predictor of CMVO/NR obtained from multivariable logistic regression models ( odds ratio )**

| CMVO/NR                                            | Odds ratio | Std.Err | Z    | P>  Z  | 95% CI      |
|----------------------------------------------------|------------|---------|------|--------|-------------|
| Age                                                | 1.032      | .007    | 4.96 | <0.001 | 1.02~1.045  |
| Periprocedural bradycardia                         | 1.818      | .285    | 3.82 | <0.001 | 1.338~2.471 |
| Using thrombus aspiration devices during operation | 1.835      | .329    | 3.39 | 0.001  | 1.291~2.606 |
| Completely block of culprit vessel                 | 1.656      | .331    | 2.52 | 0.012  | 1.119~2.45  |

|                       |       |       |       |        |             |
|-----------------------|-------|-------|-------|--------|-------------|
| Neutrophil percentage | 1.022 | 0.007 | 3.14  | 0.002  | 1.008~1.036 |
| Cons                  | .001  | .001  | -9.64 | <0.001 | .0003~.005  |

**Table 3. Predictor of CMVO/NR obtained from multivariable logistic regression models ( Coef )**

| CMVO/NR                                                  | Coef   | Std.Err | Z     | P>  Z  | 95% CI       |
|----------------------------------------------------------|--------|---------|-------|--------|--------------|
| Age                                                      | .032   | .006    | 4.96  | <0.001 | .019~.045    |
| Periprocedural<br>bradycardia                            | .598   | .156    | 3.82  | <0.001 | .291~.905    |
| Using thrombus<br>aspiration devices<br>during operation | .607   | .179    | 3.39  | 0.001  | .256~.958    |
| Completely block<br>of culprit vessel                    | .504   | .2      | 2.52  | 0.012  | .112 ~.896   |
| Neutrophil percentage                                    | .022   | .007    | 3.14  | 0.002  | .008 ~.035   |
| Cons                                                     | -6.677 | .692    | -9.64 | <0.001 | -8.034~-5.32 |

## References

- [1] Kloner RA. The importance of no-reflow/microvascular obstruction in the STEMI patient. *Eur Heart J.* 2017. 38(47): 3511-3513.
- [2] Ibáñez B, Heusch G, Ovize M, Van de Werf F. Evolving therapies for myocardial ischemia/reperfusion injury. *J Am Coll Cardiol* 2015;65:1454-71.
- [3] de Waha S, Patel MR, Granger CB, et al. Relationship between microvascular obstruction and adverse events following primary percutaneous coronary intervention for ST-segment elevation myocardial infarction: an individual patient data pooled analysis from seven randomized trials. *Eur Heart J.* 2017. 38(47): 3502-3510.
- [4] Ibanez B, James S, Agewall S, et al. 2017 ESC Guidelines for the management of acute myocardial infarction in patients presenting with ST-segment elevation: The Task Force for the management of acute myocardial infarction in patients

- presenting with ST-segment elevation of the European Society of Cardiology (ESC). *Eur Heart J*, 2018,39(2):119-177.
- [5] Niccoli G, Scalone G, Lerman A, Crea F. Coronary microvascular obstruction in acute myocardial infarction. *Eur Heart J* 2016;37:1024-33.
- [6] Heusch G. Coronary microvascular obstruction: the new frontier in cardioprotection. *Basic Res Cardiol*, 2019,114(6):45.
- [7] Thygesen K, Alpert JS, Jaffe AS, et al. Fourth universal definition of myocardial infarction (2018). *Eur Heart J*, 2019,40(3):237-269.
- [8] Kusumoto FM, Schoenfeld MH, Barrett C, et al. 2018 ACC/AHA/HRS Guideline on the Evaluation and Management of Patients With Bradycardia and Cardiac Conduction Delay: A Report of the American College of Cardiology/American Heart Association Task Force on Clinical Practice Guidelines and the Heart Rhythm Society. *Circulation*. 2019. 140(8): e382-e482.
- [9] Baran DA, Grines CL, Bailey S, et al. SCAI clinical expert consensus statement on the classification of cardiogenic shock: This document was endorsed by the American College of Cardiology (ACC), the American Heart Association (AHA), the Society of Critical Care Medicine (SCCM), and the Society of Thoracic Surgeons (STS) in April 2019. *Catheter Cardiovasc Interv*. 2019. 94(1): 29-37.
- [10] Li Y, Lyu S. Risk Factors of Periprocedural Bradycardia during Primary Percutaneous Coronary Intervention in Patients with Acute ST-Elevation Myocardial Infarction. *Cardiol Res Pract*. 2019. 2019: 4184702.
- [11] Ustinova EE, Schultz HD. Activation of cardiac vagal afferents in ischemia and reperfusion. Prostaglandins versus oxygen-derived free radicals. *Circ Res* 1994;74:904-11.
- [12] Campagna JA, Carter C. Clinical relevance of the Bezold-Jarisch reflex[J]. *Anesthesiology*, 2003,98(5):1250-1260.
- [13] Fajar JK, Heriansyah T, Rohman MS. The predictors of no reflow phenomenon after percutaneous coronary intervention in patients with ST elevation myocardial infarction: A meta-analysis. *Indian Heart J* 2018;70 Suppl 3:S406-406S418.
- [14] Kirma C, Izgi A, Dundar C, et al. Clinical and procedural predictors of no-reflow phenomenon after primary percutaneous coronary interventions: experience at a single center. *Circ J* 2008;72:716-21.
- [15] Durante A, Camici PG. Novel insights into an "old" phenomenon: the no reflow. *Int J Cardiol*. 2015. 187: 273-80.
